# Supplementary material
Source: publisher figshare collection journal article supplement (https://frontiersin.figshare.com/ndownloader/files/22559606)

AD/NC

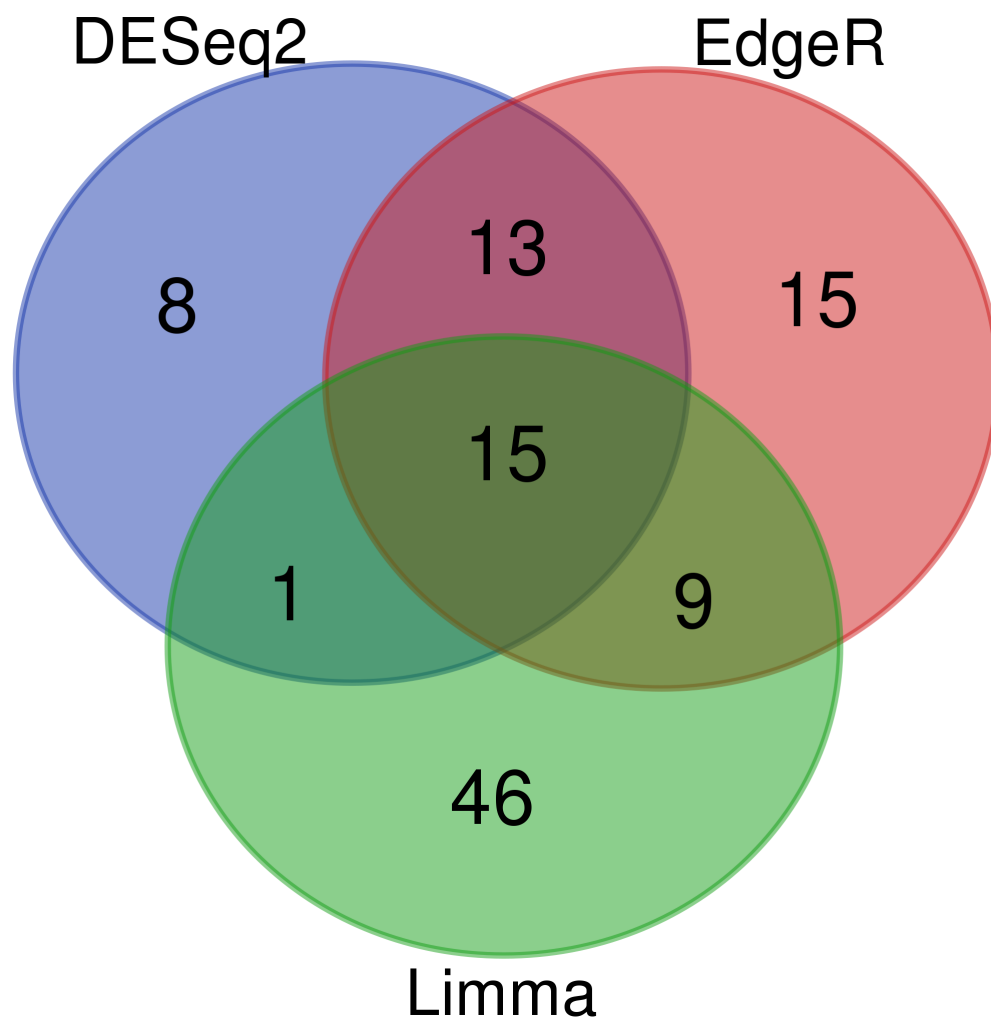

PD/NC

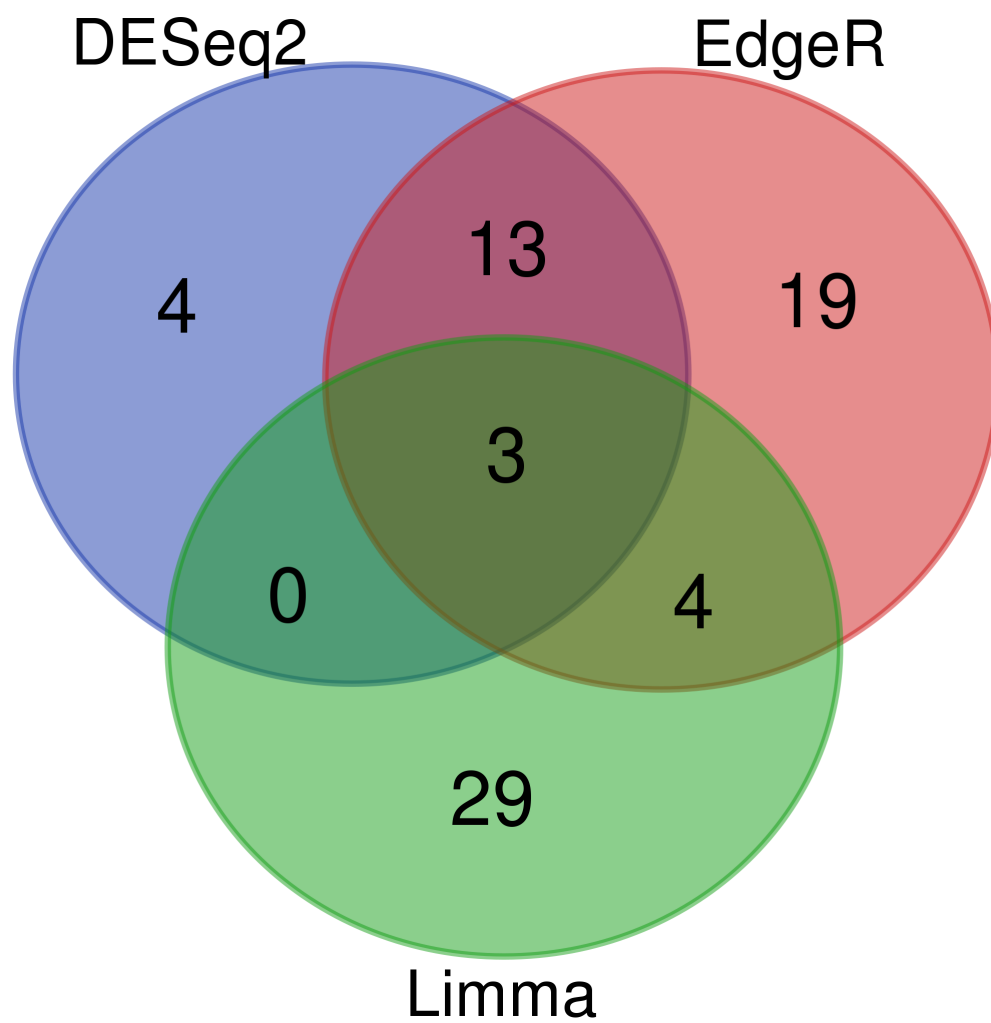

Supplement: Supplementary file [file 22559606]
